# Supplementary material for: A sensitive ratiometric fluorescence probe with a large spectral shift for sensing and imaging of palladium
Source: Royal Society of Chemistry journal article supplement (doi:10.1039/d3an01158e), 2023-01-01
Supplement: d3an01158e1.pdf [file d3an01158e1.pdf]

*Supplementary Materials for*

**A sensitive ratiometric fluorescence probe with large spectral shift for sensing and imaging of palladium**

Hongyu Li,<sup>abc\*</sup> Yue Jian,<sup>abc</sup> Xue Luo,<sup>abc</sup> Yan An,<sup>abc</sup> Mingyan Yang,<sup>abc</sup> Jie Gao,<sup>abc</sup> Junjun Luo,<sup>abc</sup> Xinmin Li,<sup>abc</sup> Jiajia Lv,<sup>abc</sup> Zeli Yuan<sup>abc\*</sup>

<sup>a</sup> College of Pharmacy, Zunyi Medical University, Zunyi, Guizhou 563003, China;

<sup>b</sup> Key Laboratory of Basic Pharmacology of Ministry of Education and Joint International Research Laboratory of Ethnomedicine of Ministry of Education, Zunyi Medical University, Zunyi, Guizhou 563000, China;

<sup>c</sup> Guizhou International Scientific and Technological Cooperation Base for Medical Photo-Theranostics Technology and Innovative Drug Development, Zunyi, Guizhou 563003, China.

**Table of contents**

|                                                                                |     |
|--------------------------------------------------------------------------------|-----|
| Synthesis and characterization of the compounds.....                           | S2  |
| Comparison of PF-Pd with some recently reported ratiometric probes for Pd..... | S5  |
| Spectroscopic measurement of Pd <sup>0</sup> .....                             | S7  |
| Colorimetric analysis of Pd <sup>0</sup> by PF-Pd.....                         | S8  |
| Biocompatibility of PF-Pd.....                                                 | S8  |
| Fluorescence imaging.....                                                      | S9  |
| NMR spectra of the compounds.....                                              | S10 |
| References.....                                                                | S20 |

## Synthesis and characterization of the compounds

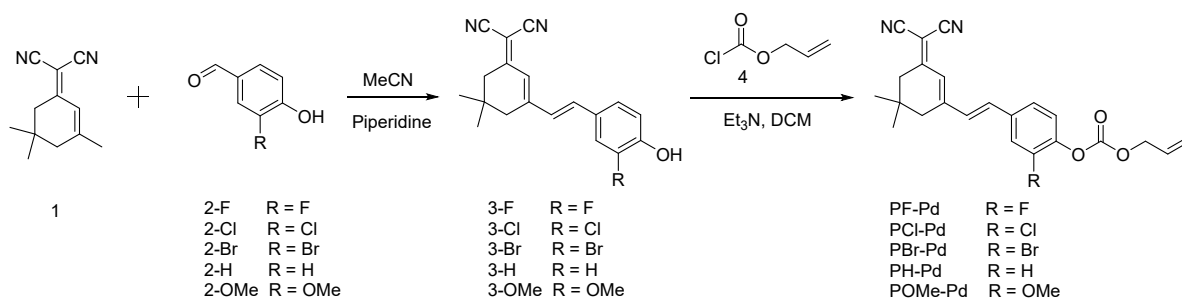

**Scheme S1.** Synthetic route of the probes.

3-F (orange solid, yield 67 %),  $^1\text{H}$  NMR (400 MHz,  $\text{DMSO-}d_6$ ):  $\delta$  10.43 (s, 1H), 7.61 – 7.54 (m, 1H), 7.33 – 7.22 (m, 2H), 7.17 (d,  $J = 16.1$  Hz, 1H), 6.93 (t,  $J = 8.7$  Hz, 1H), 6.80 (s, 1H), 2.57 (s, 2H), 2.48 (s, 2H), 0.98 (s, 6H).  $^{13}\text{C}$  NMR (101 MHz,  $\text{DMSO-}d_6$ ):  $\delta$  170.8, 156.7, 152.8, 150.4, 147.1, 137.4, 128.2, 126.1, 122.5, 118.3, 115.1, 114.5, 113.6, 75.9, 42.7, 38.5, 32.1, 27.9. HR-ESI-MS:  $m/z$  calcd. for  $\text{C}_{19}\text{H}_{16}\text{FN}_2\text{O}$   $[\text{M-H}]^-$ , 307.1252; found, 307.1252.

3-Cl (orange solid, yield 71 %),  $^1\text{H}$  NMR (400 MHz,  $\text{DMSO-}d_6$ ):  $\delta$  10.74 (s, 1H), 7.79 (d,  $J = 2.0$  Hz, 1H), 7.47 (s, 1H), 7.25 (d,  $J = 32.0$  Hz, 2H), 6.98 (d,  $J = 8.5$  Hz, 1H), 6.84 (s, 1H), 2.60 (s, 2H), 2.51 (s, 2H), 1.01 (s, 6H).  $^{13}\text{C}$  NMR (101 MHz,  $\text{DMSO-}d_6$ ):  $\delta$  170.7, 156.7, 154.9, 137.0, 129.5, 128.9, 128.9, 128.2, 122.5, 120.9, 117.2, 114.5, 113.6, 76.0, 42.7, 38.5, 32.1, 27.9. HR-ESI-MS:  $m/z$  calcd. for  $\text{C}_{19}\text{H}_{16}\text{ClN}_2\text{O}$   $[\text{M-H}]^-$ , 323.0957; found, 323.0956.

3-Br (orange solid, yield 80 %),  $^1\text{H}$  NMR (400 MHz,  $\text{DMSO-}d_6$ ):  $\delta$  10.82 (s, 1H), 7.93 (d,  $J = 2.0$  Hz, 1H), 7.52 (dd,  $J = 8.5, 2.0$  Hz, 1H), 7.34 – 7.14 (m, 2H), 6.96 (d,  $J = 8.4$  Hz, 1H), 6.84 (s, 1H), 2.59 (s, 2H), 2.50 (s, 2H), 1.00 (s, 6H).  $^{13}\text{C}$  NMR (101 MHz,  $\text{DMSO-}d_6$ ):  $\delta$  170.72, 156.66, 155.92, 136.91, 132.58, 129.48, 129.35, 128.11, 122.50, 116.92, 114.46, 113.63, 110.57, 75.93, 42.67, 40.53, 40.32, 40.11, 39.90, 39.69, 39.48, 39.27, 38.50, 32.10, 27.88. HR-ESI-MS:  $m/z$  calcd. for  $\text{C}_{19}\text{H}_{16}\text{BrN}_2\text{O}$   $[\text{M-H}]^-$ , 367.0451; found, 367.0450.

3-H (orange solid, yield 76 %),  $^1\text{H}$  NMR (400 MHz,  $\text{DMSO-}d_6$ ):  $\delta$  10.01 (s, 1H), 7.56 (d,  $J = 8.4$  Hz, 2H), 7.30 – 7.12 (m, 2H), 6.80 (d,  $J = 6.0$  Hz, 3H), 2.59 (s, 2H), 2.52 (s, 2H), 1.01 (s, 6H).  $^{13}\text{C}$  NMR (101 MHz,  $\text{DMSO-}d_6$ ):  $\delta$  170.7, 159.8, 157.2, 138.7, 130.3, 127.5, 126.7, 121.8, 116.3, 114.6, 113.8, 75.2, 42.7, 38.6, 32.1, 27.9. HR-ESI-MS:  $m/z$  calcd. for

C<sub>19</sub>H<sub>17</sub>N<sub>2</sub>O [M-H]<sup>-</sup>, 289.1346; found, 289.1346.

3-OMe (orange solid, yield 69 %), <sup>1</sup>H NMR (400 MHz, DMSO-*d*<sub>6</sub>): δ 9.63 (s, 1H), 7.35 (d, *J* = 1.4 Hz, 1H), 7.31 – 7.17 (m, 2H), 7.10 (dd, *J* = 8.2, 1.5 Hz, 1H), 6.84 – 6.76 (m, 2H), 3.83 (s, 3H), 2.60 (s, 2H), 2.53 (s, 2H), 1.01 (s, 6H). <sup>13</sup>C NMR (101 MHz, DMSO-*d*<sub>6</sub>): δ 170.7, 157.3, 149.3, 148.4, 139.2, 128.1, 126.9, 123.5, 121.7, 116.0, 114.6, 113.9, 110.8, 75.0, 56.0, 42.7, 38.6, 32.1, 27.9. HR-ESI-MS: *m/z* calcd. for C<sub>20</sub>H<sub>19</sub>N<sub>2</sub>O<sub>2</sub> [M-H]<sup>-</sup>, 319.1452; found, 319.1452.

PF-Pd (yellow solid, yield 55 %), <sup>1</sup>H NMR (400 MHz, CDCl<sub>3</sub>): δ 7.36 – 7.31 (m, 1H), 7.29 – 7.25 (m, 2H), 6.95 (d, *J* = 3.9 Hz, 2H), 6.86 (s, 1H), 6.08 – 5.92 (m, 1H), 5.45 (dd, *J* = 17.2, 1.3 Hz, 1H), 5.39 – 5.34 (m, 1H), 4.78 (d, *J* = 5.8 Hz, 2H), 2.61 (s, 2H), 2.46 (s, 2H), 1.09 (s, 6H). <sup>13</sup>C NMR (101 MHz, CDCl<sub>3</sub>): δ 169.01, 155.46, 152.80, 152.32, 139.09, 135.41, 134.38, 130.63, 124.42, 123.83, 123.72, 119.89, 115.28, 115.09, 113.25, 112.47, 79.69, 69.86, 42.95, 39.17, 32.04, 28.01. HR-ESI-MS: *m/z* calcd. for C<sub>23</sub>H<sub>22</sub>FN<sub>2</sub>O<sub>3</sub> [M+H]<sup>+</sup>, 393.1609; found, 393.1610.

PCI-Pd (yellow solid, yield 60 %), <sup>1</sup>H NMR (400 MHz, CDCl<sub>3</sub>): δ 7.59 (d, *J* = 2.0 Hz, 1H), 7.42 (dd, *J* = 8.5, 2.0 Hz, 1H), 7.27 (d, *J* = 7.3 Hz, 1H), 6.95 (s, 2H), 6.87 (s, 1H), 6.06 – 5.96 (m, 1H), 5.46 (dd, *J* = 17.2, 1.3 Hz, 1H), 5.36 (dd, *J* = 10.4, 1.1 Hz, 1H), 4.78 (dt, *J* = 5.8, 1.2 Hz, 2H), 2.61 (s, 2H), 2.45 (s, 2H), 1.09 (s, 6H). <sup>13</sup>C NMR (101 MHz, CDCl<sub>3</sub>): δ 169.0, 152.8, 152.3, 147.6, 135.2, 134.1, 130.7, 129.1, 127.6, 126.7, 124.4, 123.7, 119.8, 113.2, 112.4, 79.7, 69.8, 42.9, 39.1, 32.0, 28.0. HR-ESI-MS: *m/z* calcd. for C<sub>23</sub>H<sub>22</sub>CIN<sub>2</sub>O<sub>3</sub> [M+H]<sup>+</sup>, 409.1313; found, 409.1317.

PBr-Pd (yellow solid, yield 59 %), <sup>1</sup>H NMR (400 MHz, CDCl<sub>3</sub>): δ 7.76 (d, *J* = 1.9 Hz, 1H), 7.47 (dd, *J* = 8.5, 2.0 Hz, 1H), 7.27 (d, *J* = 2.8 Hz, 1H), 6.95 (s, 2H), 6.86 (s, 1H), 6.06 – 5.96 (m, 1H), 5.50 – 5.41 (m, 1H), 5.38 – 5.31 (m, 1H), 4.79 (d, *J* = 5.8 Hz, 2H), 2.61 (s, 2H), 2.45 (s, 2H), 1.09 (s, 6H). <sup>13</sup>C NMR (101 MHz, CDCl<sub>3</sub>): δ 169.0, 152.8, 152.3, 148.8, 135.5, 133.9, 132.2, 130.7, 127.4, 124.5, 123.7, 119.9, 116.7, 113.2, 112.5, 79.7, 69.8, 42.9, 39.1, 32.0, 28.0. HR-ESI-MS: *m/z* calcd. for C<sub>23</sub>H<sub>22</sub>BrN<sub>2</sub>O<sub>3</sub> [M+H]<sup>+</sup>, 453.0808; found, 453.0813.

PH-Pd (yellow solid, yield 67 %), <sup>1</sup>H NMR (400 MHz, CDCl<sub>3</sub>): δ 7.53 (d, *J* = 8.7 Hz, 2H), 7.23 (d, *J* = 8.7 Hz, 2H), 7.07 – 6.91 (m, 2H), 6.85 (s, 1H), 6.04 – 5.97 (m, 1H), 5.49 –

5.31 (m, 2H), 4.76 (dt,  $J = 5.9, 1.2$  Hz, 2H), 2.61 (s, 2H), 2.47 (s, 2H), 1.09 (s, 6H).  $^{13}\text{C}$  NMR (101 MHz,  $\text{CDCl}_3$ ):  $\delta$  169.2, 153.5, 153.1, 151.8, 135.6, 133.6, 130.9, 129.5, 128.6, 123.8, 121.7, 119.8, 113.4, 112.6, 79.0, 69.4, 43.0, 39.2, 32.0, 28.0. HR-ESI-MS:  $m/z$  calcd. for  $\text{C}_{23}\text{H}_{23}\text{N}_2\text{O}_3$   $[\text{M}+\text{H}]^+$ , 375.1703; found, 375.1714.

POMe-Pd (yellow solid, yield 48 %),  $^1\text{H}$  NMR (400 MHz,  $\text{CDCl}_3$ ):  $\delta$  7.17 – 7.11 (m, 2H), 7.07 (dd,  $J = 8.2, 1.8$  Hz, 1H), 7.02 (d,  $J = 16.1$  Hz, 1H), 6.94 (d,  $J = 16.1$  Hz, 1H), 6.86 (s, 1H), 6.05 – 5.95 (m, 1H), 5.44 (dq,  $J = 17.2, 1.4$  Hz, 1H), 5.33 (dd,  $J = 10.4, 1.2$  Hz, 1H), 4.75 (d,  $J = 5.8$  Hz, 2H), 3.92 (s, 3H), 2.61 (s, 2H), 2.47 (s, 2H), 1.09 (s, 6H).  $^{13}\text{C}$  NMR (101 MHz,  $\text{CDCl}_3$ ):  $\delta$  169.3, 153.6, 152.8, 151.5, 141.1, 136.0, 134.9, 131.0, 129.5, 123.8, 122.8, 120.8, 119.3, 113.4, 112.7, 110.4, 78.8, 69.4, 56.0, 42.9, 39.1, 32.0, 28.0. HR-ESI-MS:  $m/z$  calcd. for  $\text{C}_{24}\text{H}_{25}\text{N}_2\text{O}_4$   $[\text{M}+\text{H}]^+$ , 405.1809; found, 405.1817.

## Comparison of PF-Pd with some recently reported ratiometric probes for Pd

**Table S1.** Comparison of PF-Pd with some recently reported ratiometric probes for Pd

| Structure                                                                           | Analyte                                                 | Detection wavelength (Spectral shift) | LOD                   | Application                                         | Ref. |
|-------------------------------------------------------------------------------------|---------------------------------------------------------|---------------------------------------|-----------------------|-----------------------------------------------------|------|
| 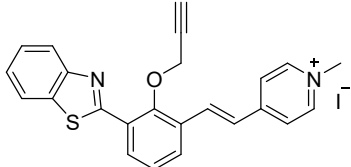   | Pd <sup>0</sup><br>Pd <sup>2+</sup><br>Pd <sup>4+</sup> | 495 nm to<br>635 nm<br>(140 nm)       | 57 nM                 | Not mentioned                                       | 1    |
|   | Pd <sup>2+</sup>                                        | 495 nm to<br>595 nm<br>(100 nm)       | 230 nM                | Cell imaging<br>Tissue imaging                      | 2    |
|  | Pd <sup>2+</sup>                                        | 445 nm to<br>550 nm<br>(105 nm)       | 280 nM                | Cell imaging<br>Tissue imaging                      | 3    |
|  | Pd <sup>0</sup><br>Pd <sup>2+</sup><br>Pd <sup>4+</sup> | 470 nm to<br>552 nm<br>(82 nm)        | 9.0 nM                | Cell imaging<br>Tissue imaging                      | 4    |
|  | Pd <sup>2+</sup>                                        | 515 nm to<br>575 nm<br>(60 nm)        | Not<br>mention<br>-ed | Cell imaging<br>Tissue imaging<br>Zebrafish imaging | 5    |
|  | Pd <sup>0</sup>                                         | 490 nm to<br>547 nm<br>(57 nm)        | 31 nM                 | Cell imaging                                        | 6    |

|                                                                                     |                  |                                 |                  |                                                                                                   |              |
|-------------------------------------------------------------------------------------|------------------|---------------------------------|------------------|---------------------------------------------------------------------------------------------------|--------------|
| 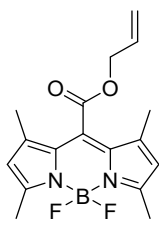   | Pd <sup>0</sup>  | 591 nm to<br>513 nm<br>(78 nm)  | 7.4 nM           | Cell imaging                                                                                      | 7            |
|    | Pd <sup>2+</sup> | 472 nm to<br>594 nm<br>(122 nm) | Not<br>mentioned | Cell imaging                                                                                      | 8            |
|    | Pd <sup>2+</sup> | 410 nm to<br>590 nm<br>(180 nm) | 170 nM           | Cell imaging                                                                                      | 9            |
|   | Pd <sup>0</sup>  | 520 nm to<br>410 nm<br>(110 nm) | 8.46 nM          | Practical water assay                                                                             | 10           |
|  | Pd <sup>0</sup>  | 590 nm to<br>640 nm<br>(50 nm)  | 5.8 nM           | Cell imaging                                                                                      | 11           |
|  | Pd <sup>0</sup>  | 517 nm to<br>665 nm<br>(148 nm) | 2.11 nM          | Colorimetric assay<br>Test strip<br>Practical water assay<br>Practical soil assay<br>Cell imaging | This<br>work |

## Spectroscopic measurement of Pd<sup>0</sup>

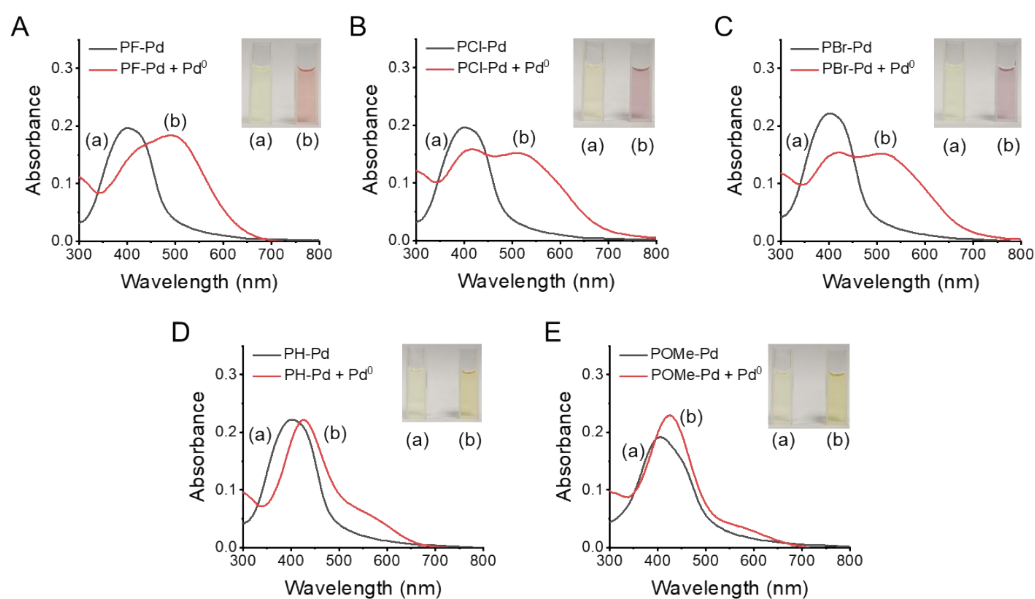

**Fig. S1.** Absorption spectra of 10 μM probe (a) before and (b) after treated with 5 μM Pd(PPh<sub>3</sub>)<sub>4</sub> in pH 7.4 phosphate buffer (10 mM, 20% DMSO).

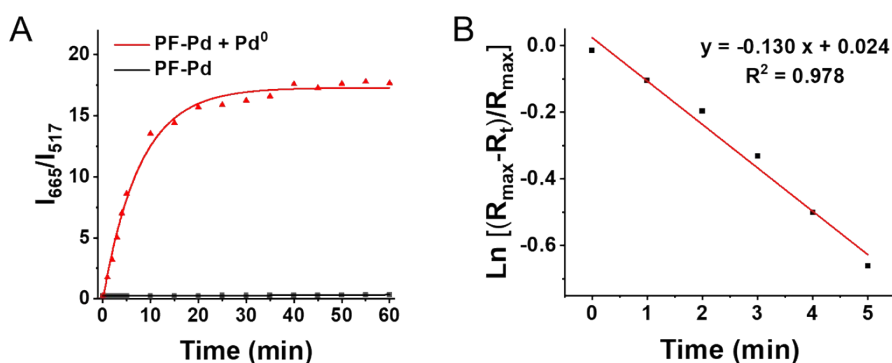

**Fig. S2.** (A) Effects of reaction time on the fluorescence ratio ( $I_{665}/I_{517}$ ) of 10 μM PF-Pd in the absence (black) and presence (red) of 3 μM Pd(PPh<sub>3</sub>)<sub>4</sub> in pH 7.4 phosphate buffer (10 mM, 20% DMSO). (B) The  $\ln[(R_{\max}-R_t)/R_{\max}] \sim t$  plot within 5 min, where  $R_{\max}$  is the maximum of  $I_{665}/I_{517}$ ,  $R_t$  is  $I_{665}/I_{517}$  of indicated time.

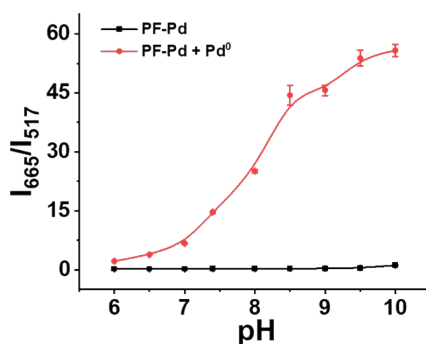

**Fig. S3.** Ratio ( $I_{665}/I_{517}$ ) of PF-Pd (10 μM) in phosphate buffer (10 mM, 20% DMSO) with different pH in the absence (black) and presence (red) of 3 μM Pd(PPh<sub>3</sub>)<sub>4</sub>.  $\lambda_{\text{ex}} = 440$  nm.

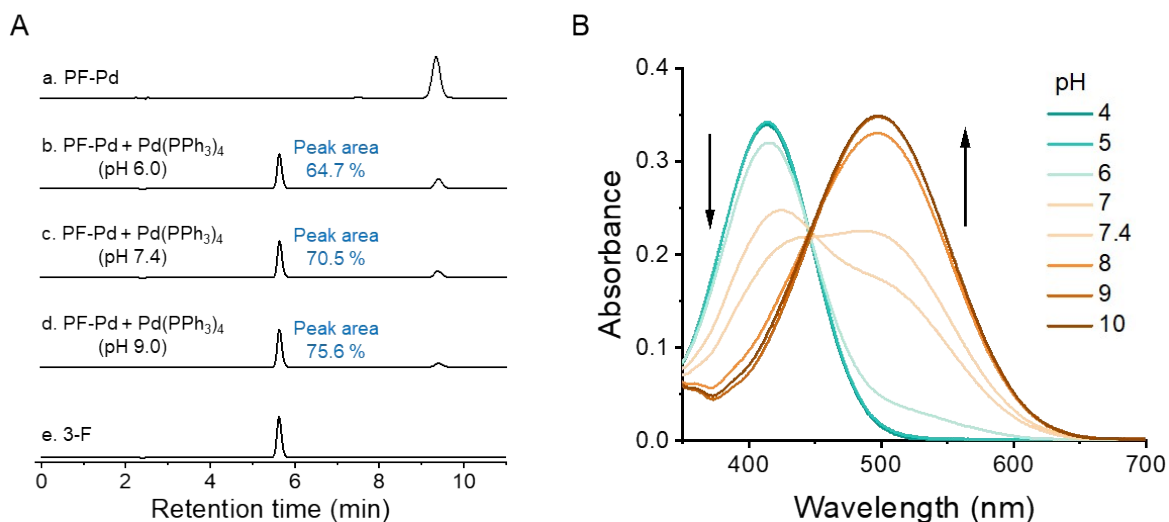

**Fig. S4.** (A) Chromatograms of different systems: (a) PF-Pd; (b-d) PF-Pd reacting with Pd(PPh<sub>3</sub>)<sub>4</sub> in (b) pH 6.0, (c) pH 7.4 or (d) pH 9.0 phosphate buffer; (e) Prepared 3-F. The chromatography peaks were recorded by the absorbance at 440 nm (isoabsorptive point) with mobile phase of 80% MeOH and 20 % H<sub>2</sub>O (0.1 % TFA). (B) Absorption spectra of 3-F under different pH.

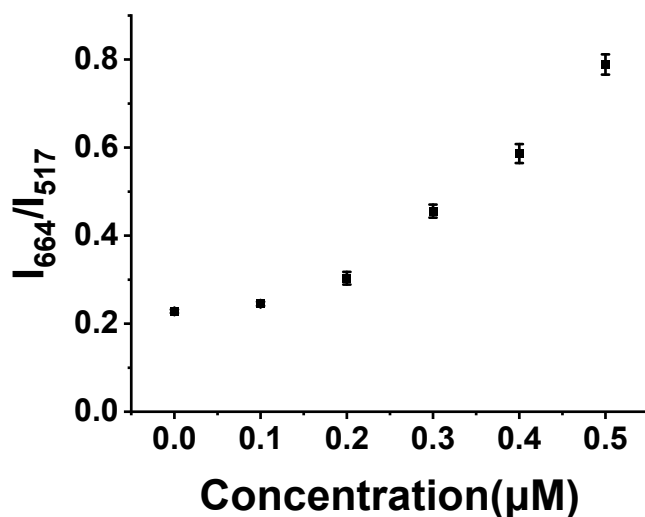

**Fig. S5.** Ratio ( $I_{665}/I_{517}$ ) of PF-Pd (10 μM) in phosphate buffer (10 mM, 20% DMSO) with low concentrations of Pd(PPh<sub>3</sub>)<sub>4</sub>.  $\lambda_{\text{ex}} = 440$  nm.



### Colorimetric analysis of Pd<sup>0</sup> by PF-Pd

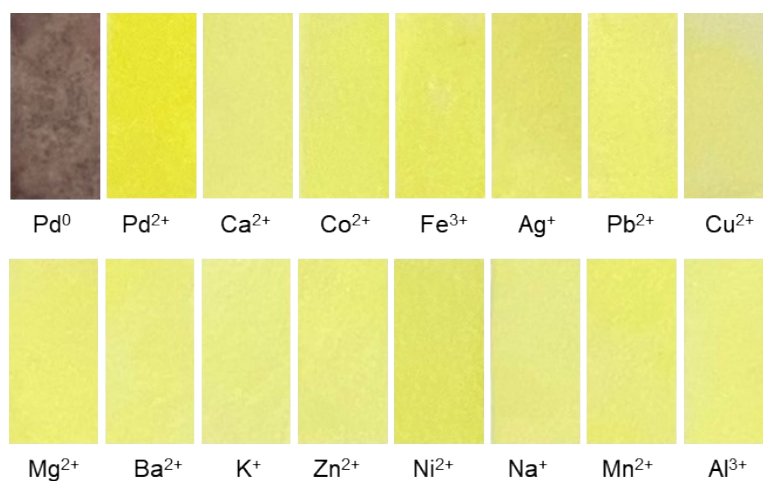

**Fig. S6.** Color changes of the PF-Pd loaded test strips in response to 1 mM of different metal ions.

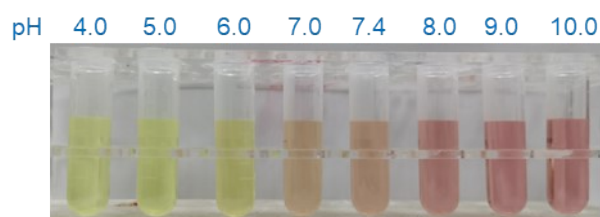

**Fig. S7.** Color of 3-F at different pH conditions.

### Biocompatibility of PF-Pd

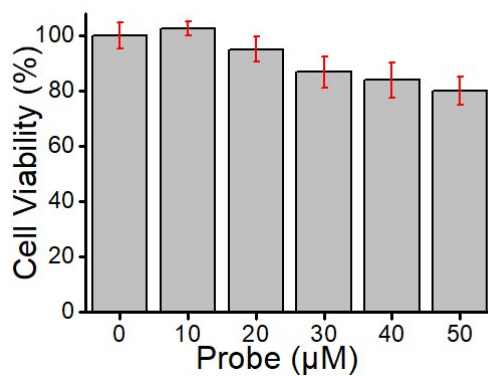

**Fig. S8.** The viability of 4T1 cells after treated with various amount of PF-Pd for 24 h. The viability of cells without PF-Pd is defined as 100%. The results are presented as mean  $\pm$  standard deviation (n = 6).

## Fluorescence imaging

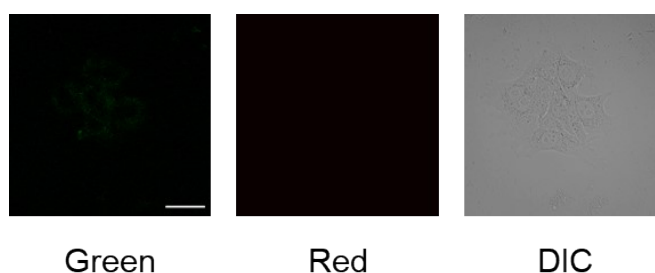

**Fig. S9.** Fluorescence and DIC images of blank 4T1 cells. Green channel:  $\lambda_{\text{ex}} = 405 \text{ nm}$ ,  $\lambda_{\text{em}} = 480 \text{ nm}-550 \text{ nm}$ ; red channel:  $\lambda_{\text{ex}} = 405 \text{ nm}$ ,  $\lambda_{\text{em}} = 620 \text{ nm}-680 \text{ nm}$ . Scale bar: 200  $\mu\text{M}$ .

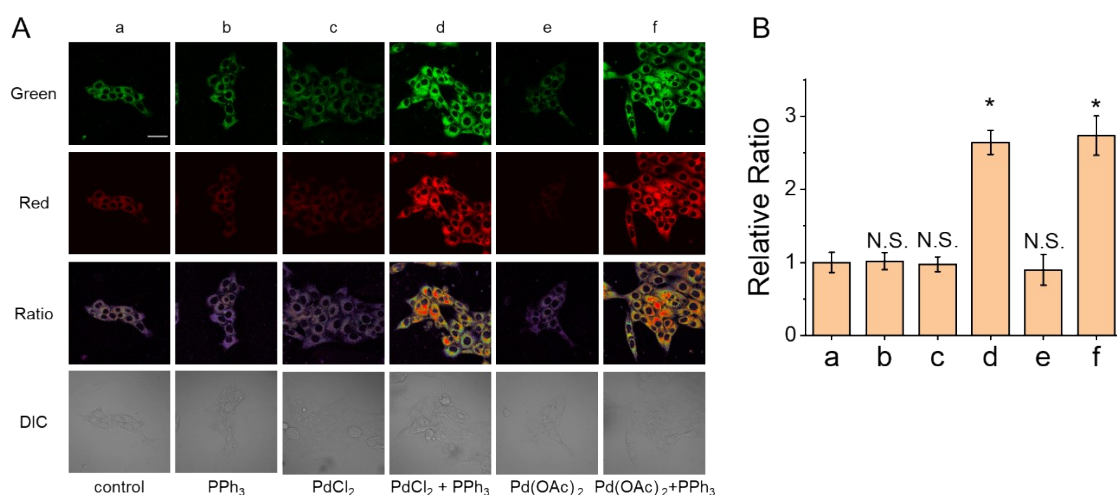

**Fig. S10.** (A) Fluorescence and DIC images of 4T1 cells under different conditions. (a) Cells treated with 10  $\mu\text{M}$  PF-Pd for 30 min. (b-f) Cells pretreated with 10  $\mu\text{M}$  PF-Pd for 30 min, then incubated with (b) 20  $\mu\text{M}$  PPh<sub>3</sub>, (c) 5  $\mu\text{M}$  PdCl<sub>2</sub>, (d) 5  $\mu\text{M}$  PdCl<sub>2</sub> + 20  $\mu\text{M}$  PPh<sub>3</sub>, (e) 5  $\mu\text{M}$  Pd(OAc)<sub>2</sub> or (f) 5  $\mu\text{M}$  Pd(OAc)<sub>2</sub> + 20  $\mu\text{M}$  PPh<sub>3</sub> for 30 min. Green channel:  $\lambda_{\text{ex}} = 405 \text{ nm}$ ,  $\lambda_{\text{em}} = 480 \text{ nm}-550 \text{ nm}$ ; red channel:  $\lambda_{\text{ex}} = 405 \text{ nm}$ ,  $\lambda_{\text{em}} = 620 \text{ nm}-680 \text{ nm}$ . Scale bar: 200  $\mu\text{M}$ . (B) Relative ratio of the fluorescence images from panel A (ratio of image a is defined as 1.0). The results are presented as mean  $\pm$  standard deviation ( $n = 3$ ). Significant differences compared to image a (N.S.: no significant difference; \* $p < 0.05$ ) are performed by Student's *t*-test.

### NMR spectra of the compounds

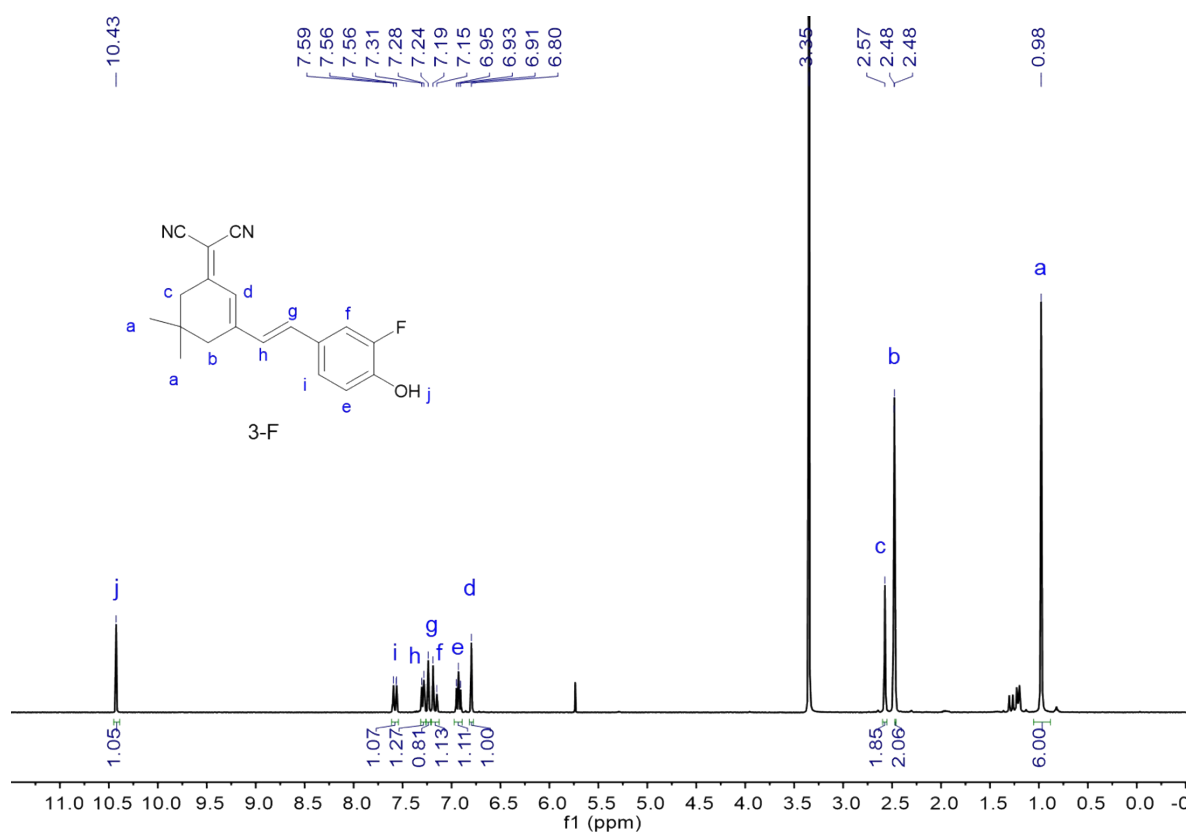

**Fig. S11.** <sup>1</sup>H NMR spectrum of 3-F in DMSO-*d*<sub>6</sub> (400 MHz, 298 K).

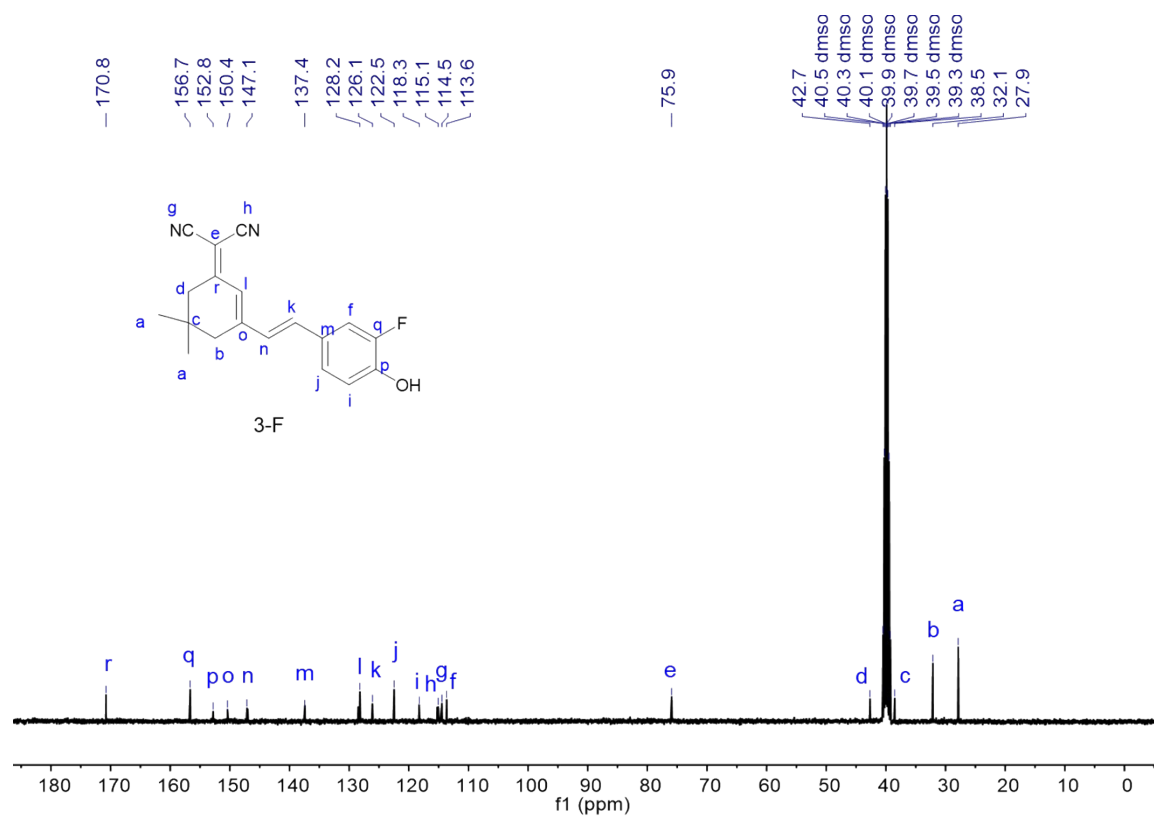

**Fig. S12.** <sup>13</sup>C NMR spectrum of 3-F in DMSO-*d*<sub>6</sub> (100 MHz, 298 K).

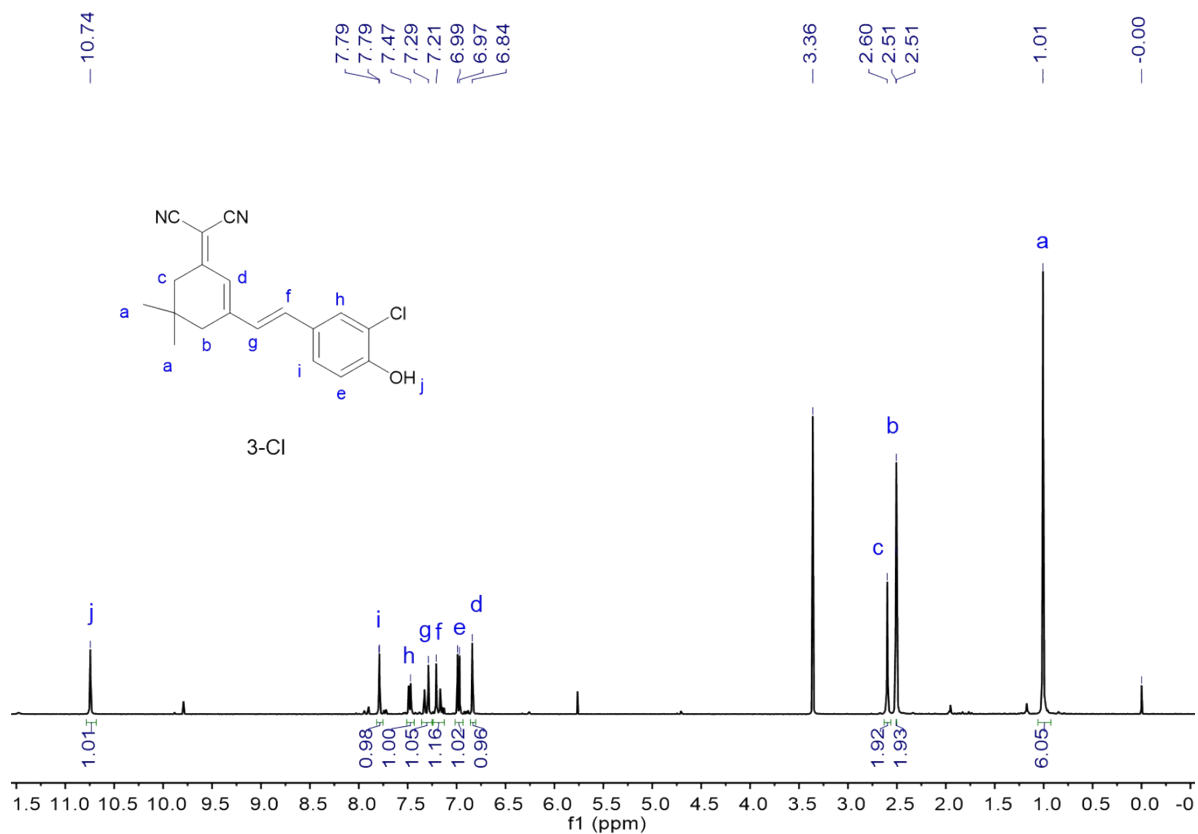

**Fig. S13.** <sup>1</sup>H NMR spectrum of 3-Cl in DMSO-*d*<sub>6</sub> (400 MHz, 298 K).

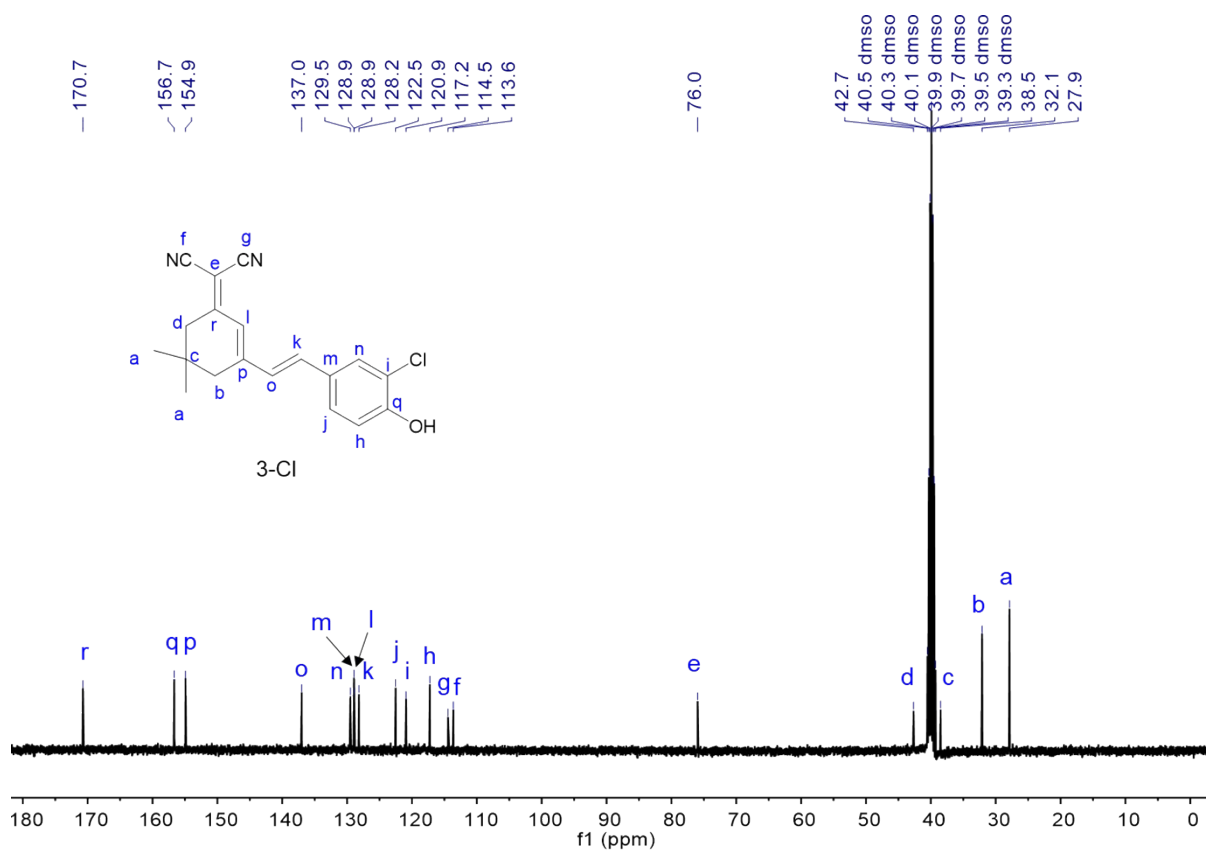

**Fig. S14.** <sup>13</sup>C NMR spectrum of 3-Cl in DMSO-*d*<sub>6</sub> (100 MHz, 298 K).

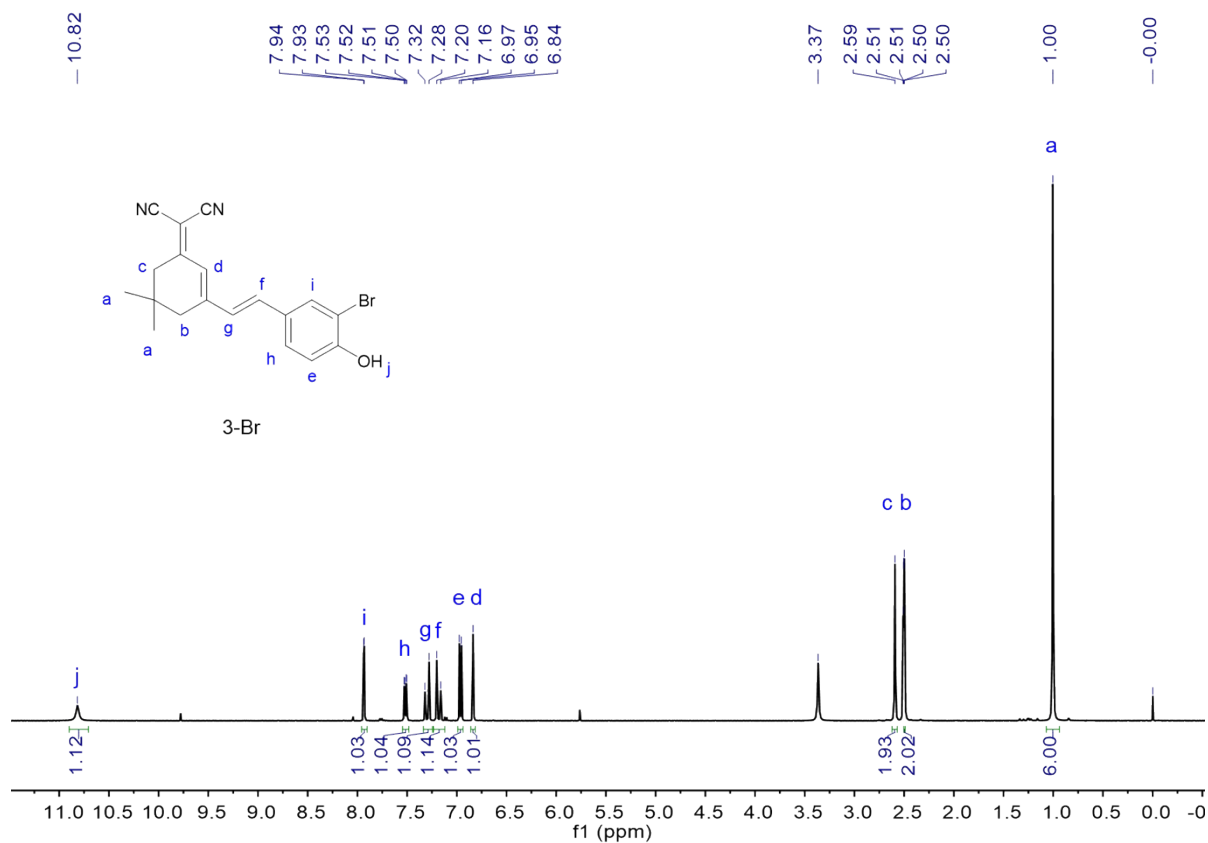

**Fig. S15.**  $^1\text{H}$  NMR spectrum of 3-Br in  $\text{DMSO-}d_6$  (400 MHz, 298 K).

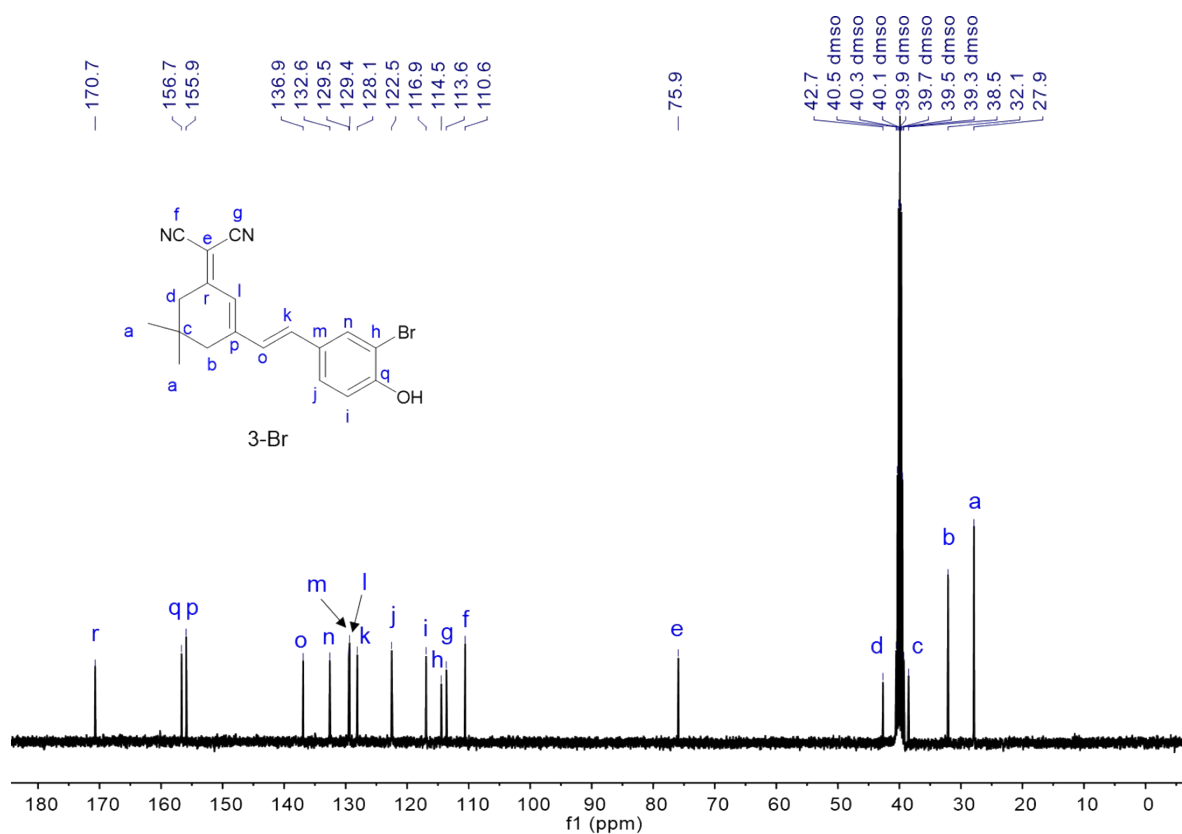

**Fig. S16.**  $^{13}\text{C}$  NMR spectrum of 3-Br in  $\text{DMSO-}d_6$  (100 MHz, 298 K).

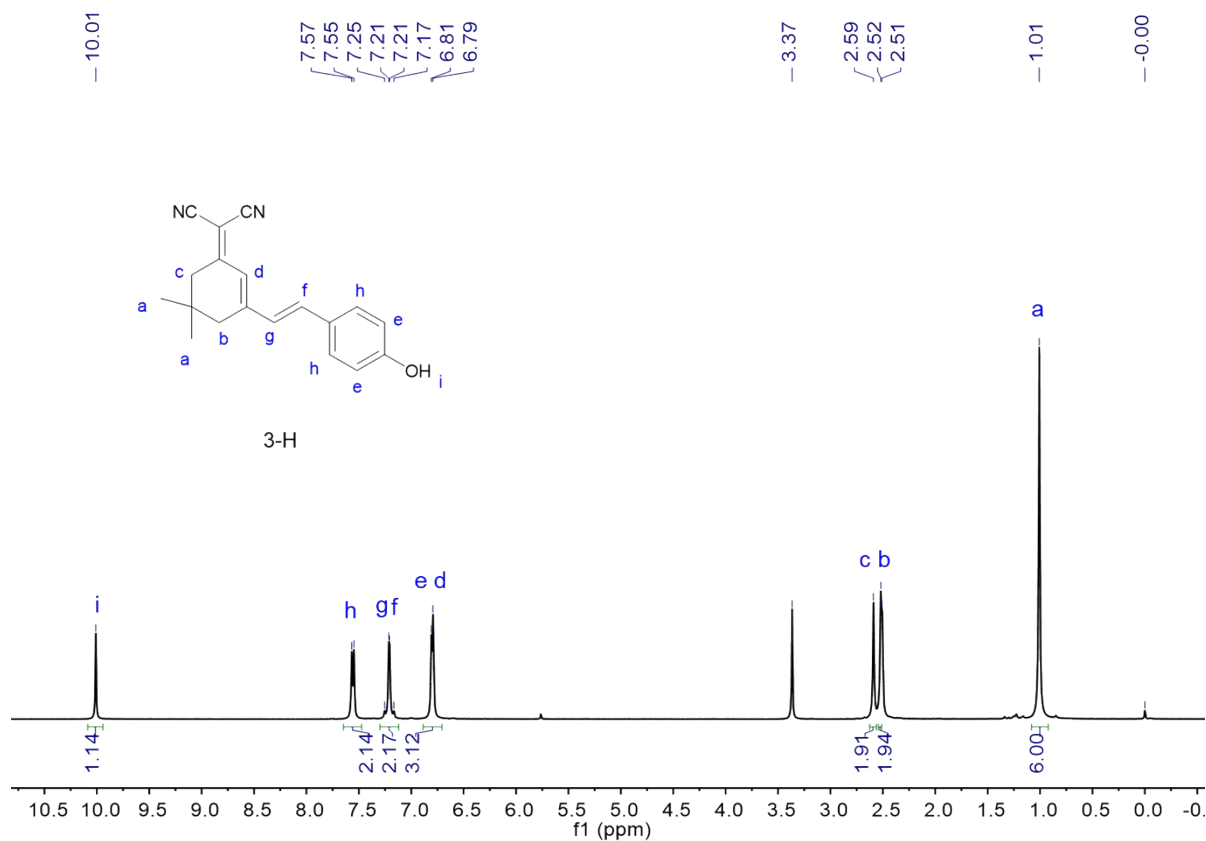

**Fig. S17.** <sup>1</sup>H NMR spectrum of 3-H in DMSO-*d*<sub>6</sub> (400 MHz, 298 K).

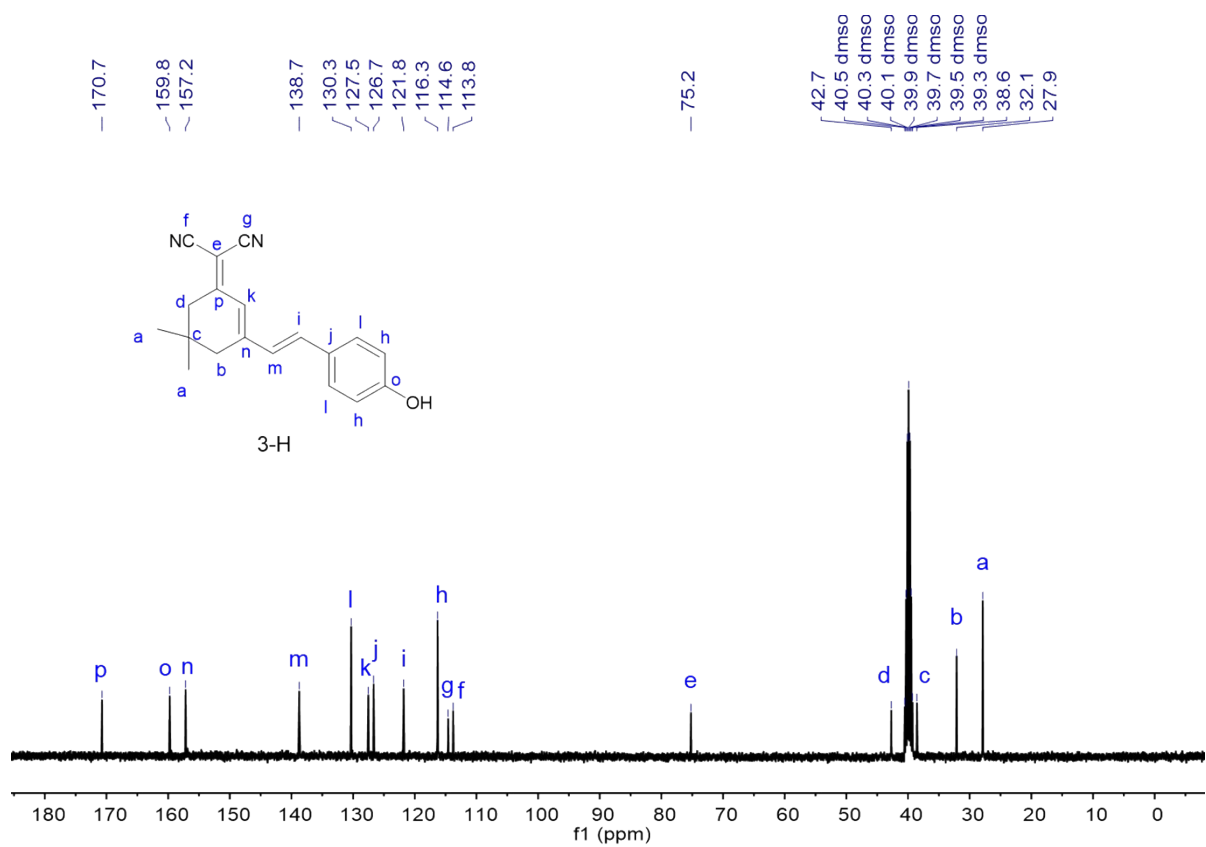

**Fig. S18.** <sup>13</sup>C NMR spectrum of 3-H in DMSO-*d*<sub>6</sub> (100 MHz, 298 K).

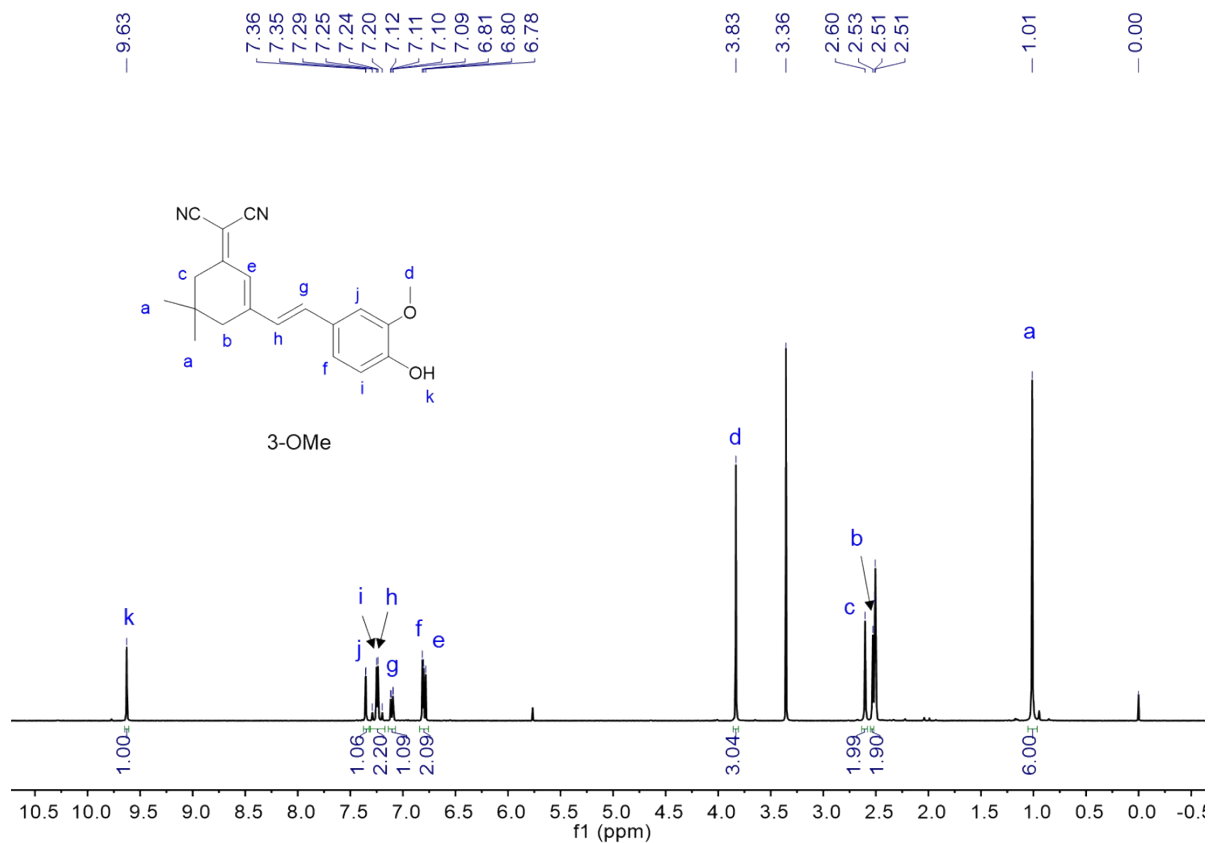

**Fig. S19.** <sup>1</sup>H NMR spectrum of 3-OMe in DMSO-*d*<sub>6</sub> (400 MHz, 298 K).

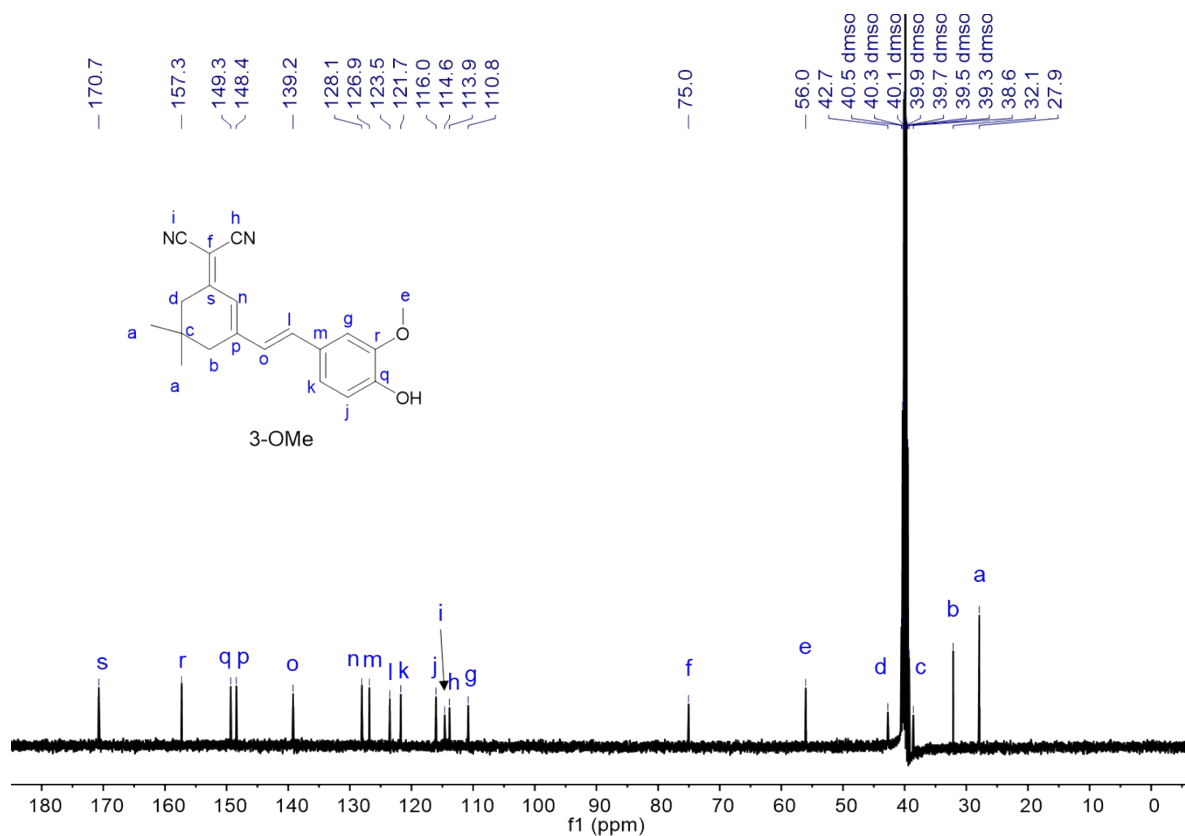

**Fig. S20.** <sup>13</sup>C NMR spectrum of 3-OMe in DMSO-*d*<sub>6</sub> (100 MHz, 298 K).

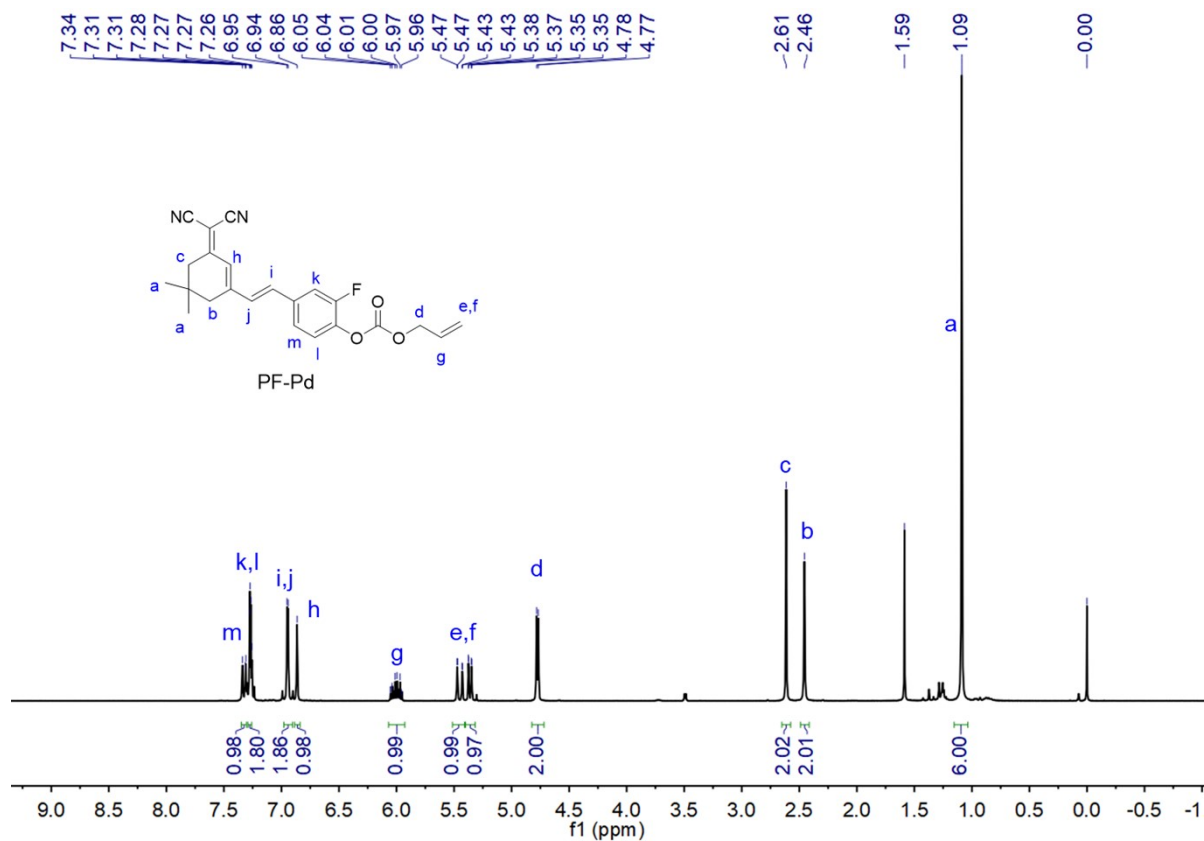

**Fig. S21.** <sup>1</sup>H NMR spectrum of PF-Pd in CDCl<sub>3</sub> (400 MHz, 298 K).

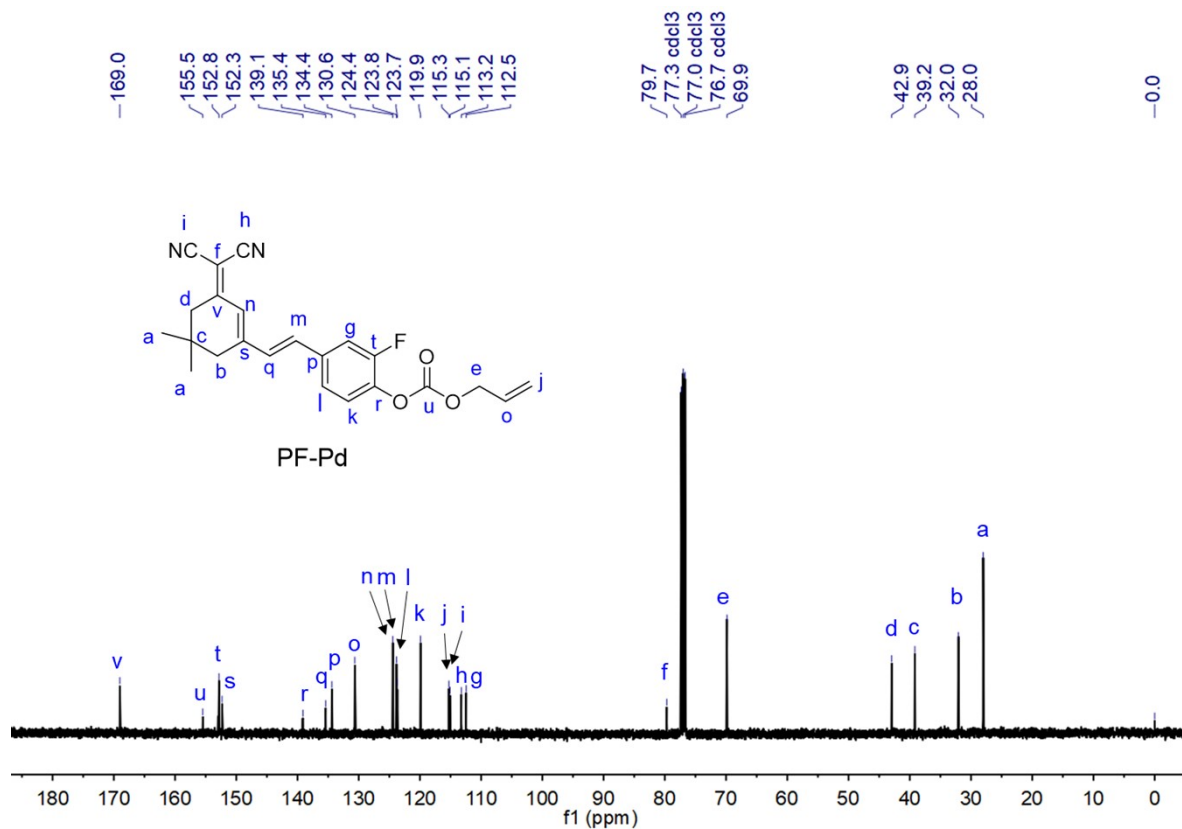

**Fig. S22.** <sup>13</sup>C NMR spectrum of PF-Pd in CDCl<sub>3</sub> (100 MHz, 298 K).



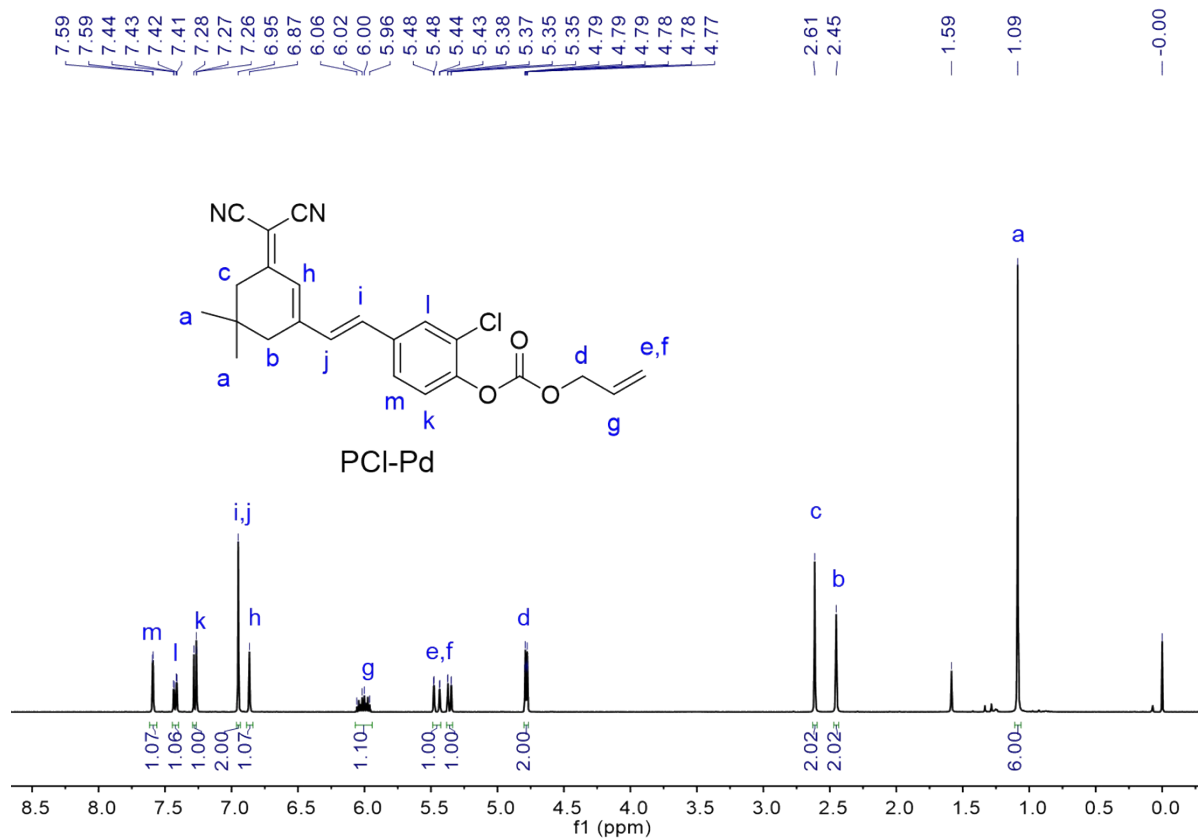

Fig. S23. <sup>1</sup>H NMR spectrum of PCI-Pd in CDCl<sub>3</sub> (400 MHz, 298 K).

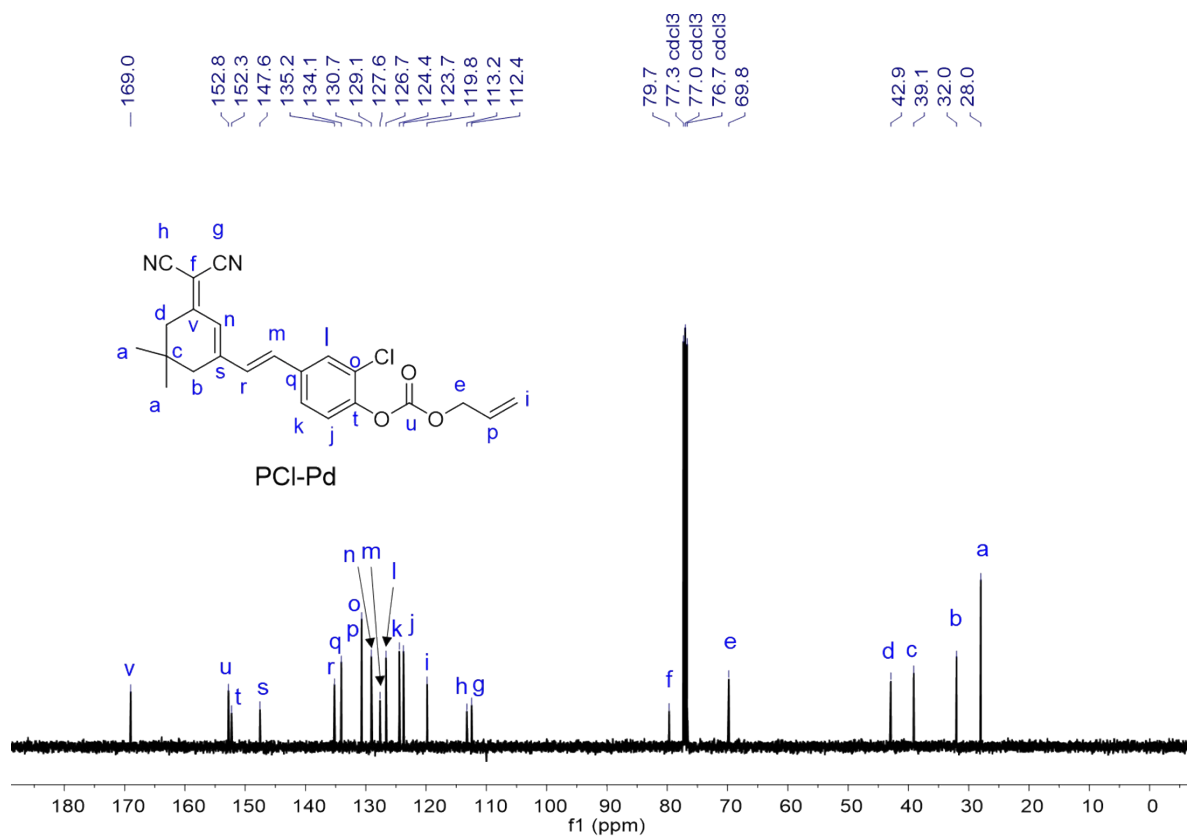

Fig. S24. <sup>13</sup>C NMR spectrum of PCI-Pd in CDCl<sub>3</sub> (100 MHz, 298 K).

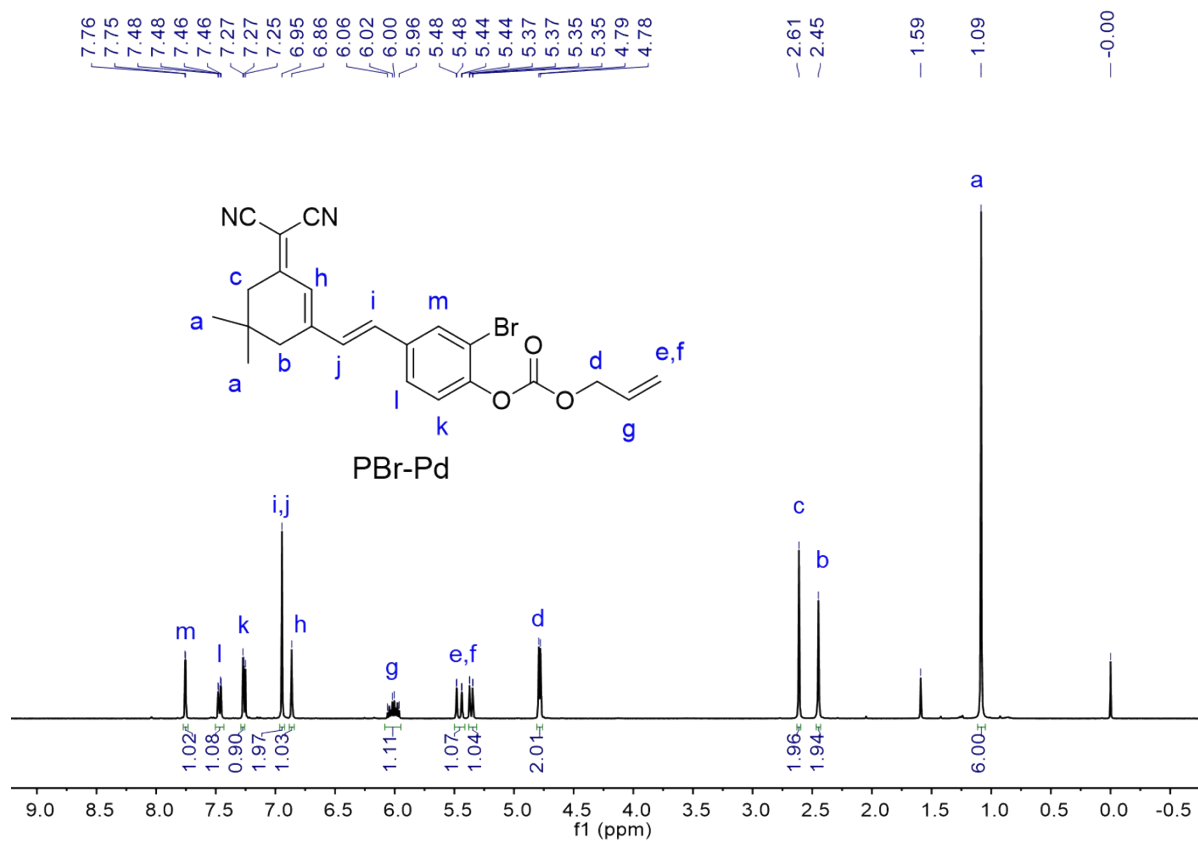

Fig. S25 <sup>1</sup>H NMR spectrum of PBr-Pd in CDCl<sub>3</sub> (400 MHz, 298 K).

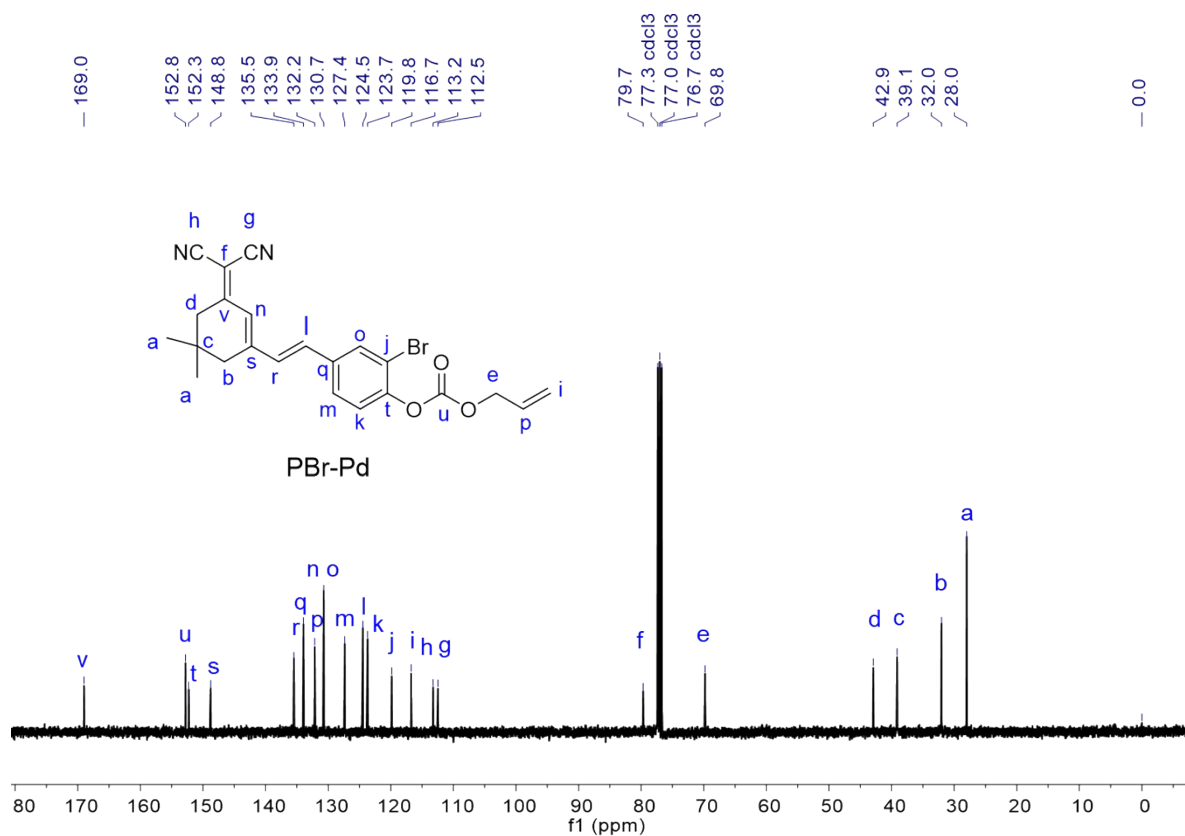

Fig. S26. <sup>13</sup>C NMR spectrum of PBr-Pd in CDCl<sub>3</sub> (100 MHz, 298 K).

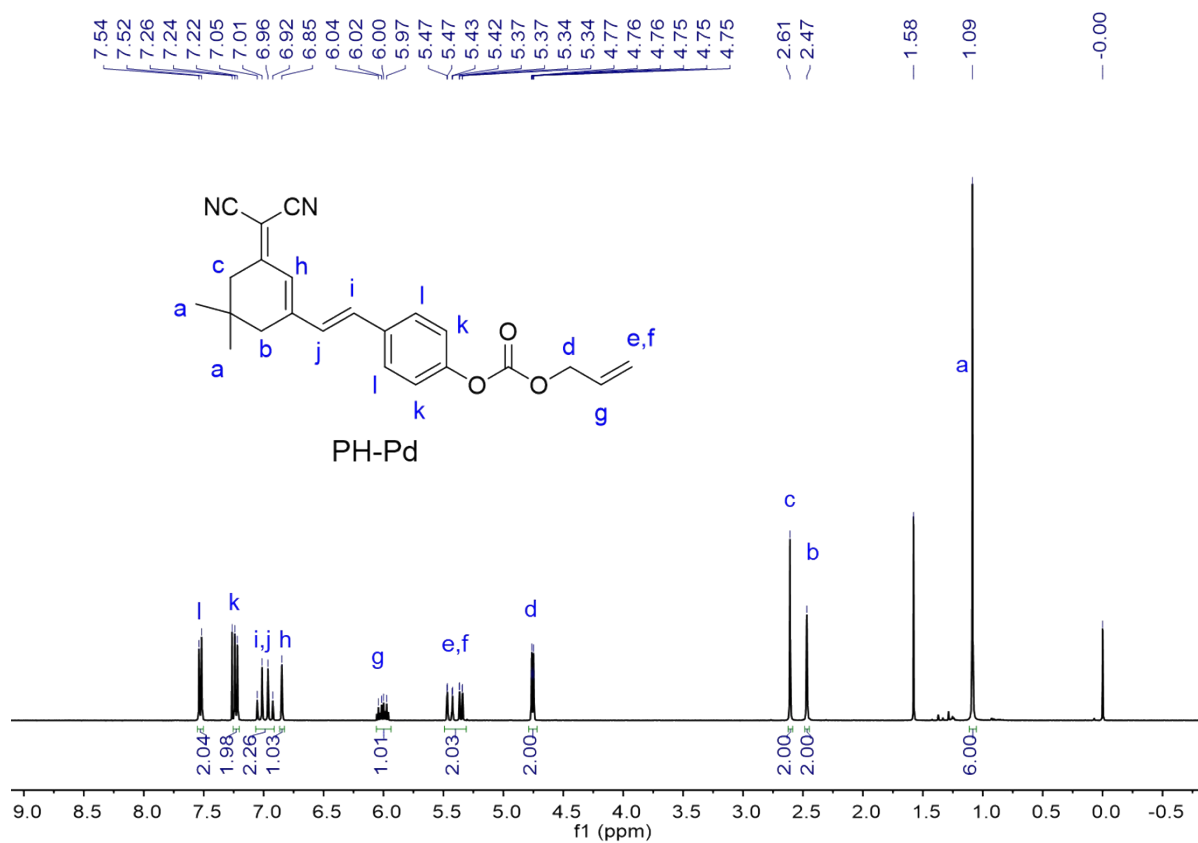

**Fig. S27.** <sup>1</sup>H NMR spectrum of PH-Pd in CDCl<sub>3</sub> (400 MHz, 298 K).

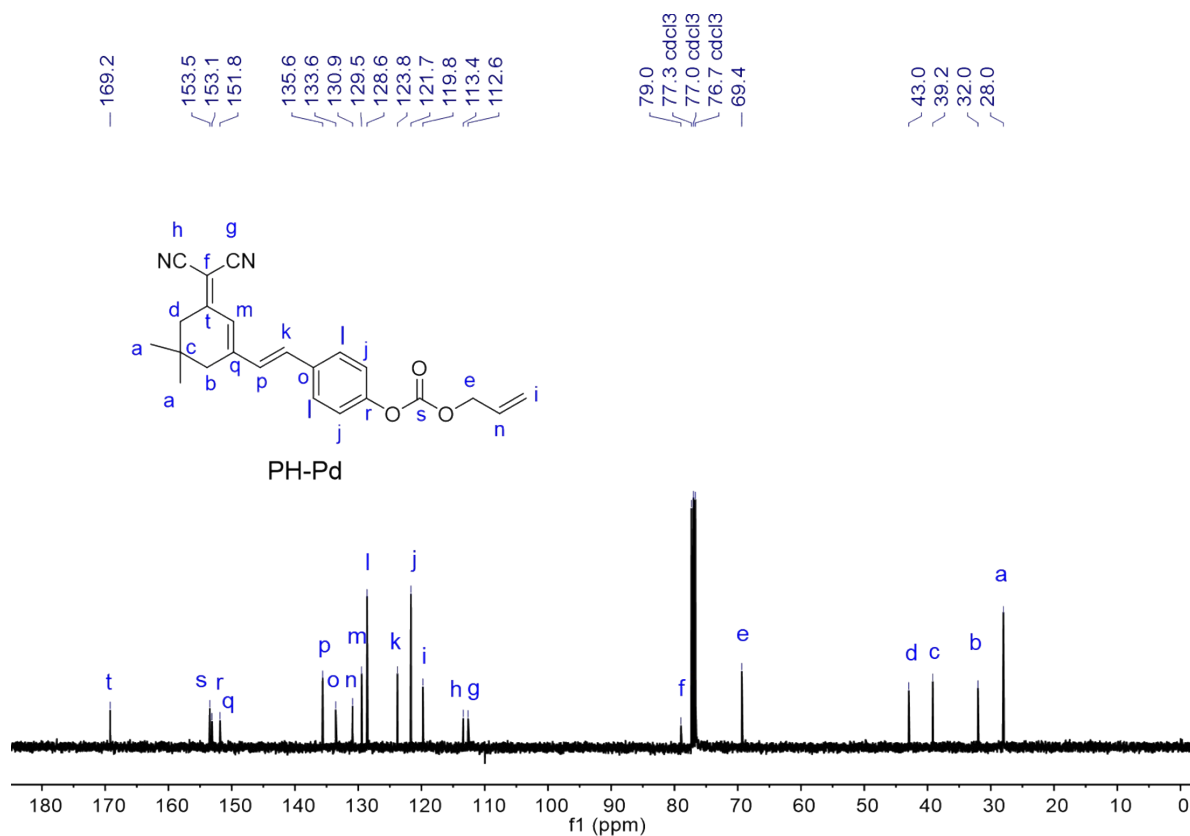

**Fig. S28.** <sup>13</sup>C NMR spectrum of PH-Pd in CDCl<sub>3</sub> (100 MHz, 298 K).

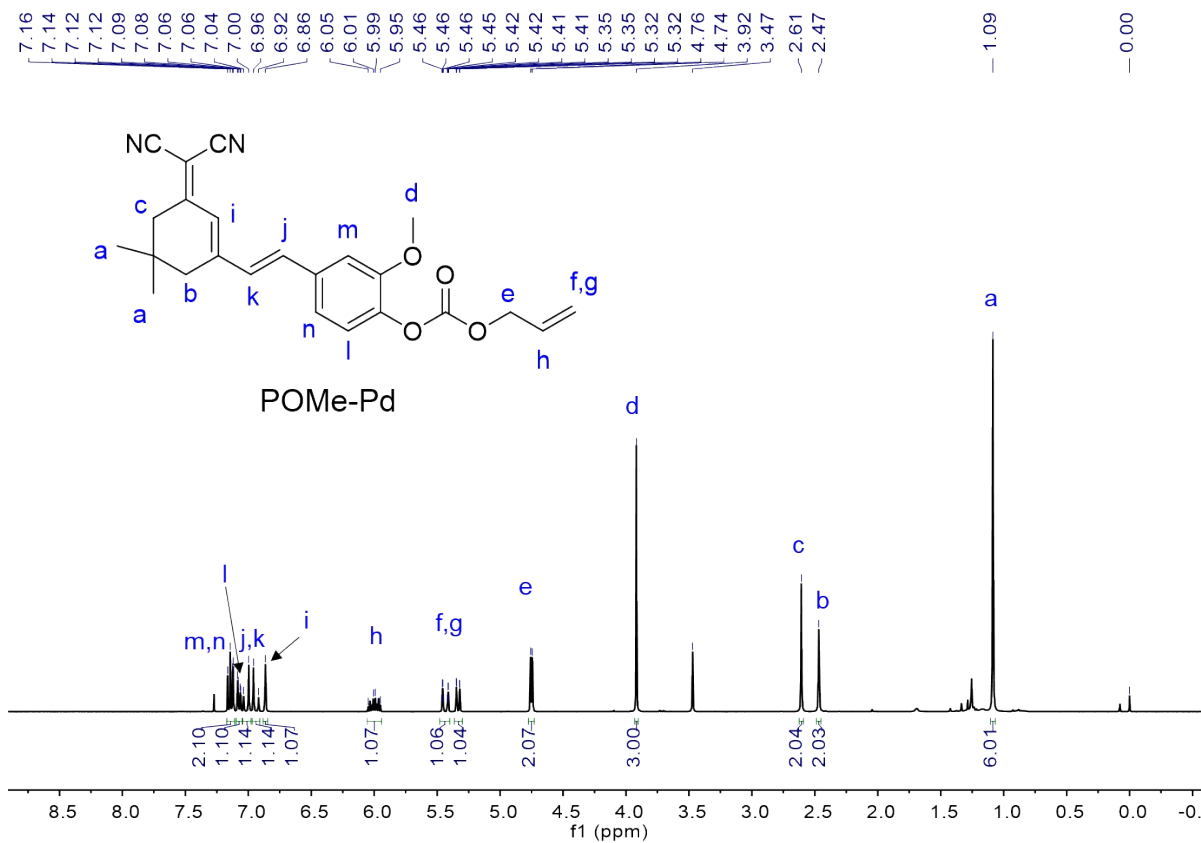

**Fig. S29.**  $^1\text{H}$  NMR spectrum of POME-Pd in  $\text{CDCl}_3$  (400 MHz, 298 K).

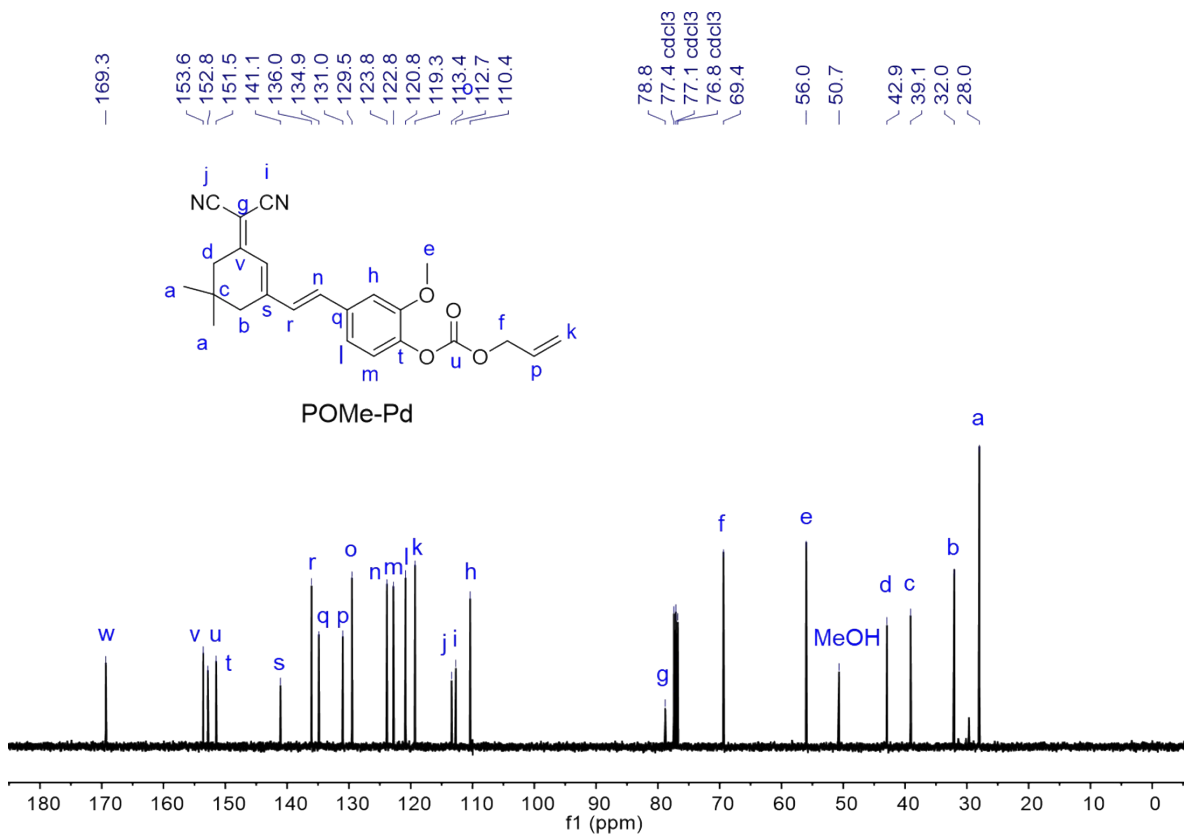

**Fig. S30.**  $^{13}\text{C}$  NMR spectrum of POME-Pd in  $\text{CDCl}_3$  (100 MHz, 298 K).

## References

1. T. Gao, P. Xu, M. Liu, A. Bi, P. Hu, B. Ye, W. Wang and W. Zeng, *Chem. Asian J.*, 2015, **10**, 1142-1145.
2. L. Zhou, Q. Wang, X.-B. Zhang and W. Tan, *Anal. Chem.*, 2015, **87**, 4503-4507.
3. L. Zhou, S. Hu, H. Wang, H. Sun and X. Zhang, *Spectrochim. Acta A Mol. Biomol. Spectrosc.*, 2016, **166**, 25-30.
4. W. Luo, J. Li and W. Liu, *Org. Biomol. Chem.*, 2017, **15**, 5846-5850.
5. L. Li, R. Guan, M. Guo, P. Ning, R. Shao and X. Meng, *Sens. Actuators, B Chem.*, 2018, **254**, 949-955.
6. W. Feng, L. Bai, S. Jia and G. Feng, *Sens. Actuators, B Chem.*, 2018, **260**, 554-562.
7. J. Zhou, S. Xu, Z. Yu, X. Ye, X. Dong and W. Zhao, *Dyes Pigm.*, 2019, **170**, 107656.
8. L. Wang, M. Ren, Z. Li, L. Dai and W. Lin, *New J. Chem.*, 2019, **43**, 552-555.
9. W. Luo, M. Lei, Y. Wang, H. Gao, Y. Wang, Q. Zhou, Z. Xu and F. Yang, *Anal. Methods*, 2019, **11**, 1080-1086.
10. Z. Ou, L. He, Y. Gao, P. Li, T. Li, J. Zhang, Y. Dong, W. Zhou and Y. Zhang, *New J. Chem.*, 2021, **45**, 5206-5212.
11. X. Li, Y. Liu, X. Li, W. Shi and H. Ma, *Biosens. Bioelectron.*, 2022, **200**, 113929.
